# Supplementary material
Source: Springer Nature journal article supplement (https://www.springermedizin.de/resource/supplementary/12883_2012_590_MOESM6_ESM.pdf/9455772)
Supplement: MOESM6 [file 9455772]

**Study****Late Seizure  
Incidence  
PHY****LEV****Odds Ratio  
(95 CI%)**

Lim 2009

2/15

2/8

0.462 (0.052 – 4.106)

Szaflarski 2010

3/14

3/20

1.545 (0.263 – 9.082)

POOLED

5/29

5/28

0.957 (0.242 – 3.790)

(I- squared = 0.0 % p = 0.400)

Random effects model

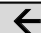**Favors  
PHY**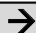**Favors  
LEV**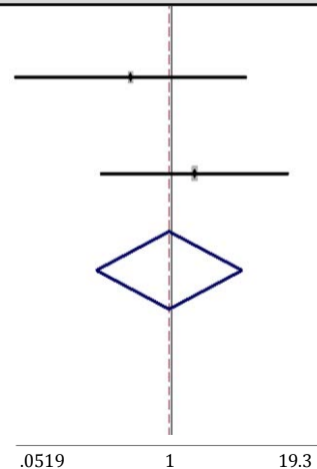

.0519

1

19.3

**Study****Late Seizure  
Incidence  
PHY****LEV****Odds Ratio  
(95 CI%)**

Lim 2009

2/15

2/8

0.462 (0.052 – 4.106)

Szaflarski 2010

3/14

3/20

1.545 (0.263 – 9.082)

POOLED

5/29

5/28

0.957 (0.242 – 3.790)

(I- squared = 0.0 % p = 0.400)

Random effects model

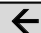**Favors  
PHY**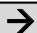**Favors  
LEV**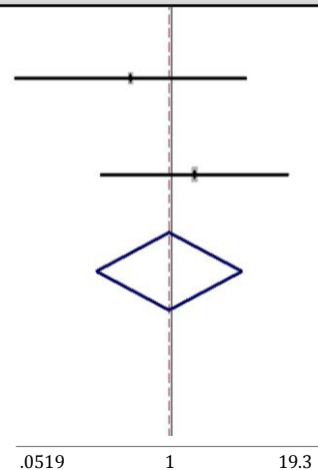

.0519

1

19.3
